# Supplementary material
Source: publisher figshare collection journal article supplement (https://acs.figshare.com/ndownloader/files/4254766)
Supplement: Supplementary file 1 [file 4254766]

data_b

 

_audit_creation_method            SHELXL-97

_chemical_name_systematic

;

 ?

;

_chemical_name_common             ?

_chemical_melting_point           ?

_chemical_formula_moiety          ?

_chemical_formula_sum

 'C13 H12 Cl N O'

_chemical_formula_weight          233.69

 

loop_

 _atom_type_symbol

 _atom_type_description

 _atom_type_scat_dispersion_real

 _atom_type_scat_dispersion_imag

 _atom_type_scat_source

 'C'  'C'   0.0033   0.0016

 'International Tables Vol C Tables 4.2.6.8 and 6.1.1.4'

 'H'  'H'   0.0000   0.0000

 'International Tables Vol C Tables 4.2.6.8 and 6.1.1.4'

 'N'  'N'   0.0061   0.0033

 'International Tables Vol C Tables 4.2.6.8 and 6.1.1.4'

 'O'  'O'   0.0106   0.0060

 'International Tables Vol C Tables 4.2.6.8 and 6.1.1.4'

 'Cl'  'Cl'   0.1484   0.1585

 'International Tables Vol C Tables 4.2.6.8 and 6.1.1.4'

 

_symmetry_cell_setting            Orthorhombic

_symmetry_space_group_name_H-M    P2(1)2(1)2(1)

 

loop_

 _symmetry_equiv_pos_as_xyz

 'x, y, z'

 '-x+1/2, -y, z+1/2'

 '-x, y+1/2, -z+1/2'

 'x+1/2, -y+1/2, -z'

 

_cell_length_a                    8.140(5)

_cell_length_b                    11.896(7)

_cell_length_c                    12.943(7)

_cell_angle_alpha                 90.00

_cell_angle_beta                  90.00

_cell_angle_gamma                 90.00

_cell_volume                      1253.4(12)

_cell_formula_units_Z             4

_cell_measurement_temperature     296(2)

_cell_measurement_reflns_used     3133

_cell_measurement_theta_min       2.96

_cell_measurement_theta_max       26.06

 

_exptl_crystal_description        block

_exptl_crystal_colour             yellow

_exptl_crystal_size_max           0.41

_exptl_crystal_size_mid           0.39

_exptl_crystal_size_min           0.25

_exptl_crystal_density_meas       ?

_exptl_crystal_density_diffrn     1.238

_exptl_crystal_density_method     'not measured'

_exptl_crystal_F_000              488

_exptl_absorpt_coefficient_mu     0.283

_exptl_absorpt_correction_type    multi-scan

_exptl_absorpt_correction_T_min   0.8928

_exptl_absorpt_correction_T_max   0.9326

_exptl_absorpt_process_details    sadabs

 

_exptl_special_details

;

 ?

;

 

_diffrn_ambient_temperature       296(2)

_diffrn_radiation_wavelength      0.71073

_diffrn_radiation_type            MoK\a

_diffrn_radiation_source          'fine-focus sealed tube'

_diffrn_radiation_monochromator   graphite

_diffrn_measurement_device_type   'CCD area detector'

_diffrn_measurement_method        'phi and omega scans'

_diffrn_detector_area_resol_mean  ?

_diffrn_standards_number          0

_diffrn_standards_interval_count  ?

_diffrn_standards_interval_time   ?

_diffrn_standards_decay_%         ?

_diffrn_reflns_number             9235

_diffrn_reflns_av_R_equivalents   0.0194

_diffrn_reflns_av_sigmaI/netI     0.0161

_diffrn_reflns_limit_h_min        -9

_diffrn_reflns_limit_h_max        9

_diffrn_reflns_limit_k_min        -14

_diffrn_reflns_limit_k_max        14

_diffrn_reflns_limit_l_min        -15

_diffrn_reflns_limit_l_max        15

_diffrn_reflns_theta_min          2.96

_diffrn_reflns_theta_max          25.49

_reflns_number_total              2333

_reflns_number_gt                 1856

_reflns_threshold_expression      >2sigma(I)

 

_computing_data_collection        'Bruker SMART'

_computing_cell_refinement        'Bruker SMART'

_computing_data_reduction         'Bruker SAINT'

_computing_structure_solution     'SHELXS-97 (Sheldrick, 1990)'

_computing_structure_refinement   'SHELXL-97 (Sheldrick, 1997)'

_computing_molecular_graphics     'Bruker SHELXTL'

_computing_publication_material   'Bruker SHELXTL'

 

_refine_special_details

;

 Refinement of F^2^ against ALL reflections.  The weighted R-factor wR and

 goodness of fit S are based on F^2^, conventional R-factors R are based

 on F, with F set to zero for negative F^2^. The threshold expression of

 F^2^ > 2sigma(F^2^) is used only for calculating R-factors(gt) etc. and is

 not relevant to the choice of reflections for refinement.  R-factors based

 on F^2^ are statistically about twice as large as those based on F, and R-

 factors based on ALL data will be even larger.

;

 

_refine_ls_structure_factor_coef  Fsqd

_refine_ls_matrix_type            full

_refine_ls_weighting_scheme       calc

_refine_ls_weighting_details

 'calc w=1/[\s^2^(Fo^2^)+(0.0387P)^2^+0.1678P] where P=(Fo^2^+2Fc^2^)/3'

_atom_sites_solution_primary      direct

_atom_sites_solution_secondary    difmap

_atom_sites_solution_hydrogens    geom

_refine_ls_hydrogen_treatment     constr

_refine_ls_extinction_method      none

_refine_ls_extinction_coef        ?

_refine_ls_abs_structure_details

 'Flack H D (1983), Acta Cryst. A39, 876-881'

_refine_ls_abs_structure_Flack    -0.02(9)

_refine_ls_number_reflns          2333

_refine_ls_number_parameters      177

_refine_ls_number_restraints      10

_refine_ls_R_factor_all           0.0485

_refine_ls_R_factor_gt            0.0358

_refine_ls_wR_factor_ref          0.0925

_refine_ls_wR_factor_gt           0.0836

_refine_ls_goodness_of_fit_ref    1.042

_refine_ls_restrained_S_all       1.041

_refine_ls_shift/su_max           0.000

_refine_ls_shift/su_mean          0.000

 

loop_

 _atom_site_label

 _atom_site_type_symbol

 _atom_site_fract_x

 _atom_site_fract_y

 _atom_site_fract_z

 _atom_site_U_iso_or_equiv

 _atom_site_adp_type

 _atom_site_occupancy

 _atom_site_symmetry_multiplicity

 _atom_site_calc_flag

 _atom_site_refinement_flags

 _atom_site_disorder_assembly

 _atom_site_disorder_group

C8 C 0.0879(15) 0.1397(9) 0.5935(5) 0.0565(16) Uani 0.646(3) 1 d PD A 1

H8A H 0.1863 0.1451 0.5515 0.068 Uiso 0.646(3) 1 calc PR A 1

H8B H 0.0663 0.2133 0.6226 0.068 Uiso 0.646(3) 1 calc PR A 1

C9 C 0.1174(4) 0.0572(3) 0.6800(2) 0.0586(8) Uani 0.646(3) 1 d PD A 1

C10 C 0.0613(4) 0.0713(2) 0.7763(2) 0.0605(7) Uani 0.646(3) 1 d PD A 1

C11 C 0.0953(7) -0.0149(4) 0.8530(3) 0.0690(12) Uani 0.646(3) 1 d PD A 1

C12 C 0.2290(11) -0.0412(8) 0.6522(9) 0.0768(19) Uani 0.646(3) 1 d PD A 1

H12A H 0.2248 -0.0965 0.7061 0.115 Uiso 0.646(3) 1 calc PR A 1

H12B H 0.3398 -0.0148 0.6445 0.115 Uiso 0.646(3) 1 calc PR A 1

H12C H 0.1928 -0.0742 0.5885 0.115 Uiso 0.646(3) 1 calc PR A 1

C13 C -0.0340(10) 0.1741(6) 0.8140(6) 0.0868(19) Uani 0.646(3) 1 d PD A 1

H13A H 0.0410 0.2272 0.8440 0.130 Uiso 0.646(3) 1 calc PR A 1

H13B H -0.1129 0.1514 0.8650 0.130 Uiso 0.646(3) 1 calc PR A 1

H13C H -0.0898 0.2084 0.7568 0.130 Uiso 0.646(3) 1 calc PR A 1

N1 N 0.1357(15) -0.0938(10) 0.9063(7) 0.0865(19) Uani 0.646(3) 1 d PD A 1

C8' C 0.059(3) 0.1605(18) 0.6039(10) 0.0565(16) Uani 0.354(3) 1 d PD A 2

H8'1 H 0.1692 0.1619 0.5752 0.068 Uiso 0.354(3) 1 calc PR A 2

H8'2 H 0.0247 0.2378 0.6137 0.068 Uiso 0.354(3) 1 calc PR A 2

C9' C 0.0656(9) 0.1038(5) 0.7079(5) 0.0586(8) Uani 0.354(3) 1 d PD A 2

C10' C 0.1467(8) 0.0092(5) 0.7230(4) 0.0605(7) Uani 0.354(3) 1 d PD A 2

C11' C 0.1388(14) -0.0436(9) 0.8241(6) 0.0690(12) Uani 0.354(3) 1 d PD A 2

C12' C -0.039(2) 0.1550(12) 0.7931(10) 0.0768(19) Uani 0.354(3) 1 d PD A 2

H12D H -0.0274 0.1115 0.8551 0.115 Uiso 0.354(3) 1 calc PR A 2

H12E H -0.1525 0.1549 0.7721 0.115 Uiso 0.354(3) 1 calc PR A 2

H12F H -0.0044 0.2308 0.8058 0.115 Uiso 0.354(3) 1 calc PR A 2

C13' C 0.229(3) -0.0557(18) 0.6365(15) 0.099(6) Uani 0.354(3) 1 d PD A 2

H13D H 0.1470 -0.0920 0.5951 0.148 Uiso 0.354(3) 1 calc PR A 2

H13E H 0.3013 -0.1112 0.6654 0.148 Uiso 0.354(3) 1 calc PR A 2

H13F H 0.2913 -0.0048 0.5942 0.148 Uiso 0.354(3) 1 calc PR A 2

N1' N 0.099(3) -0.069(2) 0.9120(13) 0.0865(19) Uani 0.354(3) 1 d PD A 2

C1 C -0.0637(2) 0.15398(15) 0.41906(14) 0.0563(4) Uani 1 1 d . A .

C2 C 0.0176(2) 0.25229(16) 0.39221(15) 0.0617(5) Uani 1 1 d . . .

H2 H 0.0798 0.2903 0.4413 0.074 Uiso 1 1 calc R . .

C3 C 0.0064(3) 0.29408(19) 0.29261(17) 0.0738(6) Uani 1 1 d . . .

H3 H 0.0586 0.3610 0.2752 0.089 Uiso 1 1 calc R . .

C4 C -0.0820(3) 0.2363(2) 0.21978(15) 0.0800(7) Uani 1 1 d . . .

C5 C -0.1641(3) 0.1389(2) 0.24404(17) 0.0836(7) Uani 1 1 d . . .

H5 H -0.2246 0.1008 0.1941 0.100 Uiso 1 1 calc R . .

C6 C -0.1552(3) 0.09819(18) 0.34449(17) 0.0709(5) Uani 1 1 d . . .

H6 H -0.2113 0.0328 0.3620 0.085 Uiso 1 1 calc R . .

C7 C -0.0554(2) 0.10554(17) 0.52543(15) 0.0635(5) Uani 1 1 d . . .

Cl1 Cl -0.09032(14) 0.28805(8) 0.09427(5) 0.1365(4) Uani 1 1 d . . .

O1 O -0.1533(2) 0.03437(17) 0.55324(13) 0.1048(6) Uani 1 1 d . A .

 

loop_

 _atom_site_aniso_label

 _atom_site_aniso_U_11

 _atom_site_aniso_U_22

 _atom_site_aniso_U_33

 _atom_site_aniso_U_23

 _atom_site_aniso_U_13

 _atom_site_aniso_U_12

C8 0.065(5) 0.054(4) 0.0505(16) 0.003(2) -0.0030(17) 0.003(2)

C9 0.070(2) 0.058(2) 0.0483(18) -0.0011(14) -0.0071(15) -0.0066(17)

C10 0.0682(18) 0.0640(18) 0.0495(15) 0.0035(12) -0.0048(13) -0.0040(14)

C11 0.074(3) 0.084(3) 0.049(2) 0.005(2) -0.005(2) -0.009(2)

C12 0.101(4) 0.061(3) 0.069(4) 0.000(3) 0.003(3) 0.000(3)

C13 0.090(3) 0.087(4) 0.083(4) -0.025(3) -0.003(3) 0.010(3)

N1 0.096(6) 0.091(6) 0.0720(15) 0.029(3) -0.011(2) 0.011(3)

C8' 0.065(5) 0.054(4) 0.0505(16) 0.003(2) -0.0030(17) 0.003(2)

C9' 0.070(2) 0.058(2) 0.0483(18) -0.0011(14) -0.0071(15) -0.0066(17)

C10' 0.0682(18) 0.0640(18) 0.0495(15) 0.0035(12) -0.0048(13) -0.0040(14)

C11' 0.074(3) 0.084(3) 0.049(2) 0.005(2) -0.005(2) -0.009(2)

C12' 0.101(4) 0.061(3) 0.069(4) 0.000(3) 0.003(3) 0.000(3)

C13' 0.174(14) 0.073(8) 0.050(6) -0.011(5) -0.012(6) 0.026(7)

N1' 0.096(6) 0.091(6) 0.0720(15) 0.029(3) -0.011(2) 0.011(3)

C1 0.0585(10) 0.0587(10) 0.0517(10) 0.0028(8) -0.0031(9) 0.0022(9)

C2 0.0672(12) 0.0623(10) 0.0556(10) 0.0019(9) 0.0011(9) 0.0030(10)

C3 0.0845(15) 0.0720(13) 0.0650(12) 0.0156(11) 0.0134(12) 0.0109(12)

C4 0.0994(17) 0.0928(16) 0.0479(11) 0.0075(11) 0.0033(12) 0.0308(15)

C5 0.0978(17) 0.0917(17) 0.0613(13) -0.0152(13) -0.0213(12) 0.0216(15)

C6 0.0767(13) 0.0674(12) 0.0684(13) -0.0020(11) -0.0129(11) 0.0039(11)

C7 0.0622(11) 0.0702(12) 0.0580(11) 0.0105(9) -0.0034(9) -0.0093(11)

Cl1 0.1874(9) 0.1686(8) 0.0535(3) 0.0281(4) 0.0067(5) 0.0528(7)

O1 0.0923(11) 0.1317(14) 0.0904(12) 0.0448(11) -0.0226(9) -0.0498(12)

 

_geom_special_details

;

 All esds (except the esd in the dihedral angle between two l.s. planes)

 are estimated using the full covariance matrix.  The cell esds are taken

 into account individually in the estimation of esds in distances, angles

 and torsion angles; correlations between esds in cell parameters are only

 used when they are defined by crystal symmetry.  An approximate (isotropic)

 treatment of cell esds is used for estimating esds involving l.s. planes.

;

 

loop_

 _geom_bond_atom_site_label_1

 _geom_bond_atom_site_label_2

 _geom_bond_distance

 _geom_bond_site_symmetry_2

 _geom_bond_publ_flag

C8 C9 1.508(5) . ?

C8 C7 1.517(14) . ?

C8 H8A 0.9700 . ?

C8 H8B 0.9700 . ?

C9 C10 1.337(4) . ?

C9 C12 1.525(6) . ?

C10 C11 1.453(5) . ?

C10 C13 1.529(5) . ?

C11 N1 1.211(6) . ?

C12 H12A 0.9600 . ?

C12 H12B 0.9600 . ?

C12 H12C 0.9600 . ?

C13 H13A 0.9600 . ?

C13 H13B 0.9600 . ?

C13 H13C 0.9600 . ?

C8' C9' 1.506(8) . ?

C8' C7 1.53(3) . ?

C8' H8'1 0.9700 . ?

C8' H8'2 0.9700 . ?

C9' C10' 1.320(7) . ?

C9' C12' 1.522(7) . ?

C10' C11' 1.453(7) . ?

C10' C13' 1.516(8) . ?

C11' N1' 1.221(9) . ?

C12' H12D 0.9600 . ?

C12' H12E 0.9600 . ?

C12' H12F 0.9600 . ?

C13' H13D 0.9600 . ?

C13' H13E 0.9600 . ?

C13' H13F 0.9600 . ?

C1 C2 1.388(3) . ?

C1 C6 1.388(3) . ?

C1 C7 1.494(3) . ?

C2 C3 1.385(3) . ?

C2 H2 0.9300 . ?

C3 C4 1.371(3) . ?

C3 H3 0.9300 . ?

C4 C5 1.374(4) . ?

C4 Cl1 1.739(2) . ?

C5 C6 1.389(3) . ?

C5 H5 0.9300 . ?

C6 H6 0.9300 . ?

C7 O1 1.217(2) . ?

 

loop_

 _geom_angle_atom_site_label_1

 _geom_angle_atom_site_label_2

 _geom_angle_atom_site_label_3

 _geom_angle

 _geom_angle_site_symmetry_1

 _geom_angle_site_symmetry_3

 _geom_angle_publ_flag

C9 C8 C7 112.3(8) . . ?

C9 C8 H8A 109.1 . . ?

C7 C8 H8A 109.1 . . ?

C9 C8 H8B 109.1 . . ?

C7 C8 H8B 109.1 . . ?

H8A C8 H8B 107.9 . . ?

C10 C9 C8 123.8(4) . . ?

C10 C9 C12 121.3(5) . . ?

C8 C9 C12 114.8(6) . . ?

C9 C10 C11 118.9(3) . . ?

C9 C10 C13 124.8(4) . . ?

C11 C10 C13 116.3(4) . . ?

N1 C11 C10 171.0(5) . . ?

C9' C8' C7 115.1(16) . . ?

C9' C8' H8'1 108.5 . . ?

C7 C8' H8'1 108.5 . . ?

C9' C8' H8'2 108.5 . . ?

C7 C8' H8'2 108.5 . . ?

H8'1 C8' H8'2 107.5 . . ?

C10' C9' C8' 122.1(8) . . ?

C10' C9' C12' 121.0(8) . . ?

C8' C9' C12' 116.7(10) . . ?

C9' C10' C11' 118.7(6) . . ?

C9' C10' C13' 123.1(11) . . ?

C11' C10' C13' 117.7(11) . . ?

N1' C11' C10' 163.3(11) . . ?

C9' C12' H12D 109.5 . . ?

C9' C12' H12E 109.5 . . ?

H12D C12' H12E 109.5 . . ?

C9' C12' H12F 109.5 . . ?

H12D C12' H12F 109.5 . . ?

H12E C12' H12F 109.5 . . ?

C10' C13' H13D 109.5 . . ?

C10' C13' H13E 109.5 . . ?

H13D C13' H13E 109.5 . . ?

C10' C13' H13F 109.5 . . ?

H13D C13' H13F 109.5 . . ?

H13E C13' H13F 109.5 . . ?

C2 C1 C6 118.98(18) . . ?

C2 C1 C7 122.29(17) . . ?

C6 C1 C7 118.72(18) . . ?

C3 C2 C1 120.3(2) . . ?

C3 C2 H2 119.9 . . ?

C1 C2 H2 119.9 . . ?

C4 C3 C2 119.6(2) . . ?

C4 C3 H3 120.2 . . ?

C2 C3 H3 120.2 . . ?

C3 C4 C5 121.4(2) . . ?

C3 C4 Cl1 119.0(2) . . ?

C5 C4 Cl1 119.6(2) . . ?

C4 C5 C6 118.8(2) . . ?

C4 C5 H5 120.6 . . ?

C6 C5 H5 120.6 . . ?

C1 C6 C5 120.8(2) . . ?

C1 C6 H6 119.6 . . ?

C5 C6 H6 119.6 . . ?

O1 C7 C1 120.75(18) . . ?

O1 C7 C8 121.2(3) . . ?

C1 C7 C8 117.8(3) . . ?

O1 C7 C8' 120.1(6) . . ?

C1 C7 C8' 118.4(6) . . ?

C8 C7 C8' 13.8(9) . . ?

 

loop_

 _geom_torsion_atom_site_label_1

 _geom_torsion_atom_site_label_2

 _geom_torsion_atom_site_label_3

 _geom_torsion_atom_site_label_4

 _geom_torsion

 _geom_torsion_site_symmetry_1

 _geom_torsion_site_symmetry_2

 _geom_torsion_site_symmetry_3

 _geom_torsion_site_symmetry_4

 _geom_torsion_publ_flag

C7 C8 C9 C10 -97.5(6) . . . . ?

C7 C8 C9 C12 87.0(7) . . . . ?

C8 C9 C10 C11 179.0(8) . . . . ?

C12 C9 C10 C11 -5.9(7) . . . . ?

C8 C9 C10 C13 -2.6(9) . . . . ?

C12 C9 C10 C13 172.5(8) . . . . ?

C9 C10 C11 N1 3(6) . . . . ?

C13 C10 C11 N1 -175(6) . . . . ?

C7 C8' C9' C10' 75.9(16) . . . . ?

C7 C8' C9' C12' -98.5(14) . . . . ?

C8' C9' C10' C11' -176.4(15) . . . . ?

C12' C9' C10' C11' -2.2(13) . . . . ?

C8' C9' C10' C13' -5(2) . . . . ?

C12' C9' C10' C13' 169.3(17) . . . . ?

C9' C10' C11' N1' 14(7) . . . . ?

C13' C10' C11' N1' -158(7) . . . . ?

C6 C1 C2 C3 0.3(3) . . . . ?

C7 C1 C2 C3 179.98(19) . . . . ?

C1 C2 C3 C4 -1.7(3) . . . . ?

C2 C3 C4 C5 1.8(3) . . . . ?

C2 C3 C4 Cl1 -178.35(17) . . . . ?

C3 C4 C5 C6 -0.6(3) . . . . ?

Cl1 C4 C5 C6 179.54(18) . . . . ?

C2 C1 C6 C5 0.8(3) . . . . ?

C7 C1 C6 C5 -178.8(2) . . . . ?

C4 C5 C6 C1 -0.7(3) . . . . ?

C2 C1 C7 O1 164.2(2) . . . . ?

C6 C1 C7 O1 -16.1(3) . . . . ?

C2 C1 C7 C8 -21.5(4) . . . . ?

C6 C1 C7 C8 158.2(4) . . . . ?

C2 C1 C7 C8' -5.8(8) . . . . ?

C6 C1 C7 C8' 173.9(8) . . . . ?

C9 C8 C7 O1 15.0(6) . . . . ?

C9 C8 C7 C1 -159.3(3) . . . . ?

C9 C8 C7 C8' 105(3) . . . . ?

C9' C8' C7 O1 12.3(14) . . . . ?

C9' C8' C7 C1 -177.6(7) . . . . ?

C9' C8' C7 C8 -86(3) . . . . ?

 

_diffrn_measured_fraction_theta_max    0.997

_diffrn_reflns_theta_full              25.49

_diffrn_measured_fraction_theta_full   0.997

_refine_diff_density_max    0.126

_refine_diff_density_min   -0.231

_refine_diff_density_rms    0.023
